# Supplementary material for: Protein Profiling of Human Nonpigmented Ciliary Epithelium Cell Secretome: The Differentiation Factors Characterization for Retinal Ganglion Cell line
Source: Hindawi journal article supplement (doi:10.1155/2011/901329), 2011-01-01
Supplement: f1 [file 901329.f1.pdf]

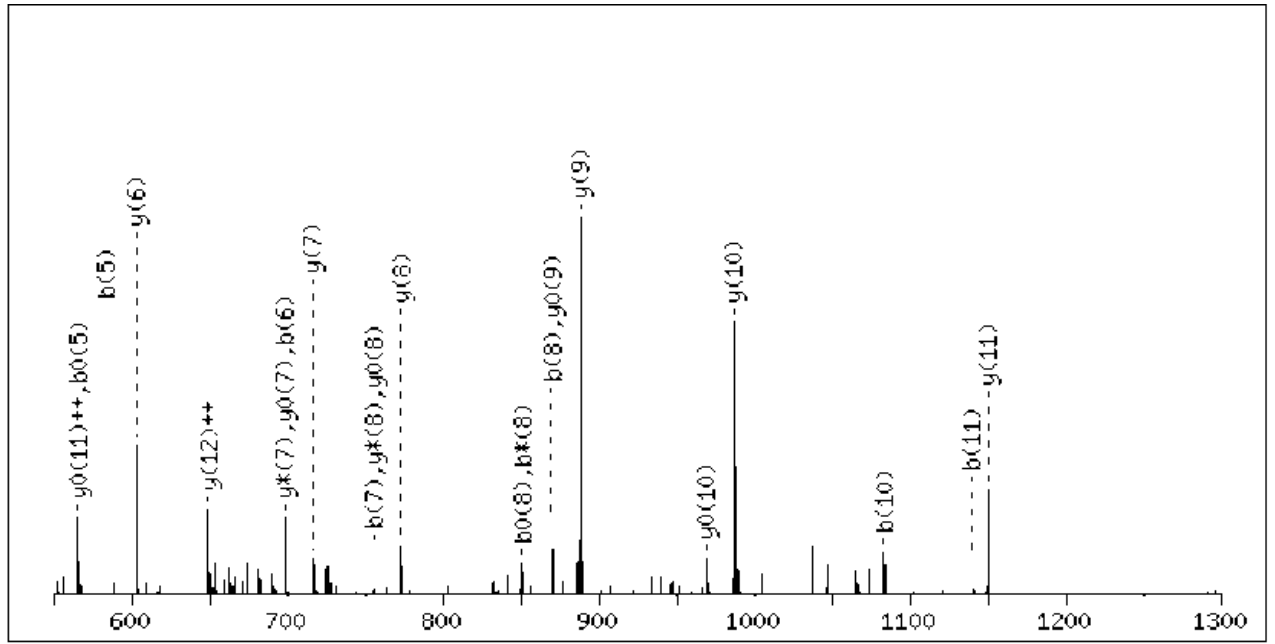

| #  | b                | b++             | b+              | b*++     | b0              | b0++     | Seq. | y                | y++             | y+              | y*++            | y0              | y0++            | #  |
|----|------------------|-----------------|-----------------|----------|-----------------|----------|------|------------------|-----------------|-----------------|-----------------|-----------------|-----------------|----|
| 1  | 88.0393          | 44.5233         |                 |          | 70.0287         | 35.5180  | S    |                  |                 |                 |                 |                 |                 | 14 |
| 2  | 175.0713         | 88.0393         |                 |          | 157.0608        | 79.0340  | S    | 1384.7107        | 692.8590        | 1367.6841       | 684.3457        | 1366.7001       | 683.8537        | 13 |
| 3  | 322.1397         | 161.5735        |                 |          | <b>304.1292</b> | 152.5682 | F    | 1297.6786        | <b>649.3430</b> | 1280.6521       | 640.8297        | 1279.6681       | 640.3377        | 12 |
| 4  | <b>485.2031</b>  | 243.1052        |                 |          | <b>467.1925</b> | 234.0999 | Y    | <b>1150.6102</b> | 575.8088        | 1133.5837       | 567.2955        | 1132.5997       | <b>566.8035</b> | 11 |
| 5  | <b>584.2715</b>  | 292.6394        |                 |          | <b>566.2609</b> | 283.6341 | V    | <b>987.5469</b>  | 494.2771        | 970.5204        | <b>485.7638</b> | <b>969.5363</b> | <b>485.2718</b> | 10 |
| 6  | <b>699.2984</b>  | 350.1529        | 682.2719        | 341.6396 | 681.2879        | 341.1476 | N    | <b>888.4785</b>  | 444.7429        | 871.4520        | 436.2296        | <b>870.4679</b> | 435.7376        | 9  |
| 7  | <b>756.3199</b>  | 378.6636        | 739.2933        | 370.1503 | 738.3093        | 369.6583 | G    | <b>773.4516</b>  | 387.2294        | <b>756.4250</b> | 378.7161        | <b>755.4410</b> | 378.2241        | 8  |
| 8  | <b>869.4039</b>  | 435.2056        | <b>852.3774</b> | 426.8923 | <b>851.3934</b> | 426.2003 | L    | <b>716.4301</b>  | 358.7187        | <b>699.4036</b> | 350.2054        | <b>698.4195</b> | 349.7134        | 7  |
| 9  | 970.4516         | <b>485.7295</b> | 953.4251        | 477.2162 | 952.4411        | 476.7242 | T    | <b>603.3460</b>  | 302.1767        | 586.3195        | 293.6634        | 585.3355        | 293.1714        | 6  |
| 10 | <b>1083.5357</b> | 542.2715        | 1066.5091       | 533.7582 | 1065.5251       | 533.2662 | L    | <b>502.2984</b>  | 251.6528        | <b>485.2718</b> | 243.1395        |                 |                 | 5  |
| 11 | <b>1140.5571</b> | 570.7822        | 1123.5306       | 562.2689 | 1122.5466       | 561.7769 | G    | <b>389.2143</b>  | 195.1108        | 372.1878        | 186.5975        |                 |                 | 4  |
| 12 | 1197.5786        | 599.2929        | 1180.5521       | 590.7797 | 1179.5680       | 590.2877 | G    | <b>332.1928</b>  | 166.6001        | 315.1663        | 158.0868        |                 |                 | 3  |
| 13 | <b>1325.6372</b> | 663.3222        | 1308.6106       | 654.8090 | 1307.6266       | 654.3169 | Q    | 275.1714         | 138.0893        | 258.1448        | 129.5761        |                 |                 | 2  |
| 14 |                  |                 |                 |          |                 |          | K    | 147.1128         | 74.0800         | 130.0863        | 65.5468         |                 |                 | 1  |

Figure S1. MS/MS Fragmentation of SSFYVNGLTLGGQK. Found in PROF1\_HUMAN, (P07737) Profilin-1 (M/Z 736.36, 2+).
