# Supplementary material for: Protein Profiling of Human Nonpigmented Ciliary Epithelium Cell Secretome: The Differentiation Factors Characterization for Retinal Ganglion Cell line
Source: Hindawi journal article supplement (doi:10.1155/2011/901329), 2011-01-01
Supplement: f2 [file 901329.f2.pdf]

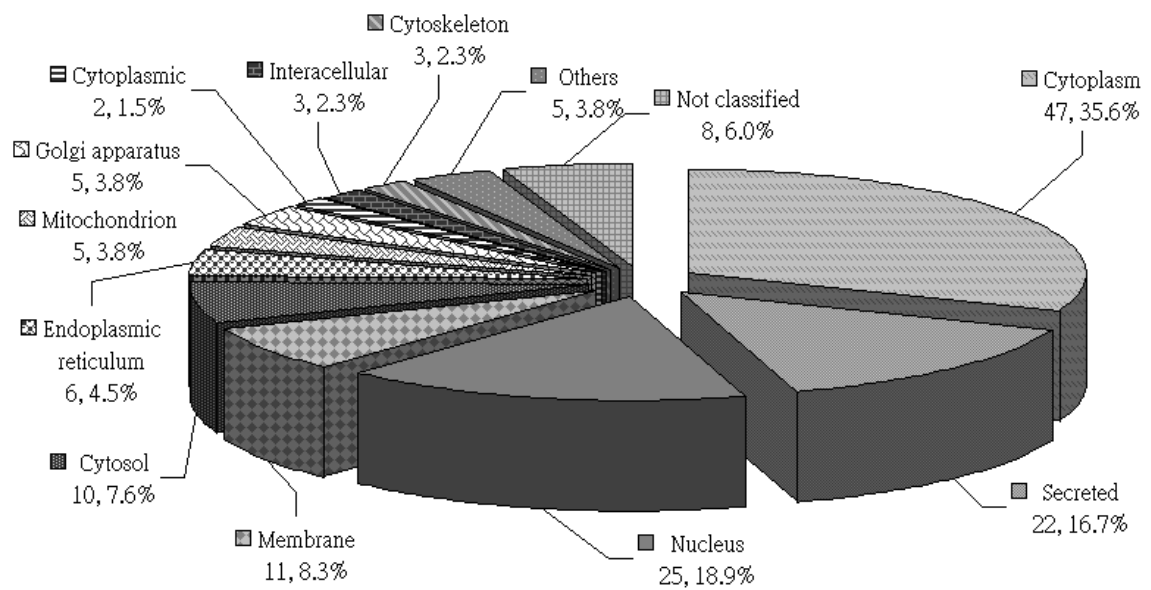

Figure S2. The cellular locations of 132 proteins synthesized were classified in this study. Assignments were made on the basis of information provided on the Swiss-Prot database at the ExPASy Molecular Biology Server. Some proteins were described to be from a different subcellular location, which explains the total sum being substantially larger than 100%.
